# Supplementary material for: Interferon-gamma drives programmed death-ligand 1 expression on islet β cells to limit T cell function during autoimmune diabetes
Source: PubMed Central journal article supplement (PMC5974126; doi:10.1038/s41598-018-26471-9), 2018-05-29
Supplement: 41598_2018_26471_MOESM1_ESM.pdf [file 41598_2018_26471_MOESM1_ESM.pdf]

| <b>Supplemental Table Patient Demographics for panels in Figure 6.</b> |                    |             |                           |               |                         |              |             |              |
|------------------------------------------------------------------------|--------------------|-------------|---------------------------|---------------|-------------------------|--------------|-------------|--------------|
| Panel A                                                                | Type               | Age         | Diabetes duration (years) | Gender        | Ethnicity               | BMI          | HbA1c       | C peptide    |
| <b>6271</b>                                                            | <b>No diabetes</b> | <b>17</b>   |                           | <b>Male</b>   | <b>Caucasian</b>        | <b>24.4</b>  |             | <b>11.47</b> |
| <b>6139</b>                                                            | <b>T2D</b>         | <b>37.2</b> | <b>1.5</b>                | <b>Female</b> | <b>Hispanic/Latino</b>  | <b>45.4</b>  |             | <b>0.6</b>   |
| <b>6267</b>                                                            | <b>Auto Ab Pos</b> | <b>23</b>   |                           | <b>Female</b> | <b>Caucasian</b>        | <b>23.5</b>  | <b>5</b>    | <b>16.59</b> |
| <b>6247</b>                                                            | <b>T1D</b>         | <b>24</b>   | <b>0.6</b>                | <b>Male</b>   | <b>Caucasian</b>        | <b>24.27</b> |             | <b>0.47</b>  |
| Panel B                                                                | Type               | Age         | Diabetes duration (years) | Gender        | Ethnicity               | BMI          | HbA1c       | C peptide    |
| <b>6178 02</b>                                                         | <b>No diabetes</b> | <b>24.5</b> |                           | <b>Female</b> | <b>Caucasian</b>        | <b>27.5</b>  | <b>5</b>    | <b>4.55</b>  |
| <b>6059 06</b>                                                         | <b>T2D</b>         | <b>18.8</b> | <b>0.25</b>               | <b>Female</b> | <b>Hispanic/Latino</b>  | <b>39.3</b>  |             | <b>10.68</b> |
| <b>6197 03</b>                                                         | <b>Auto Ab Pos</b> | <b>22</b>   |                           | <b>Male</b>   | <b>African American</b> | <b>28.2</b>  | <b>5.5</b>  | <b>17.48</b> |
| <b>6228 01</b>                                                         | <b>T1D</b>         | <b>13</b>   | <b>0</b>                  | <b>Male</b>   | <b>Caucasian</b>        | <b>17.36</b> | <b>13.3</b> | <b>0.1</b>   |
| Panel C                                                                | Type               | Age         | Diabetes duration (years) | Gender        | Ethnicity               | BMI          | HbA1c       | C peptide    |
| <b>6386</b>                                                            | <b>No diabetes</b> | <b>14</b>   |                           | <b>Male</b>   | <b>Caucasian</b>        | <b>23.89</b> | <b>5.6</b>  | <b>1.12</b>  |
| <b>6308</b>                                                            | <b>T2D</b>         | <b>13</b>   | <b>1</b>                  | <b>Female</b> | <b>Caucasian</b>        | <b>34.1</b>  |             | <b>5.2</b>   |
| <b>6310</b>                                                            | <b>Auto Ab Pos</b> | <b>28</b>   |                           | <b>Female</b> | <b>Hispanic/Latino</b>  | <b>22.4</b>  |             | <b>10.54</b> |
| <b>6362</b>                                                            | <b>T1D</b>         | <b>24.9</b> | <b>0</b>                  | <b>Male</b>   | <b>Caucasian</b>        | <b>28.5</b>  | <b>10</b>   | <b>0.38</b>  |

**Interferon-gamma drives programmed death-ligand 1 expression on islet  $\beta$  cells to limit T cell function during autoimmune diabetes**

Kevin C. Osum<sup>1, §</sup>, Adam L. Burrack<sup>1, §</sup>, Tijana Martinov<sup>1, §</sup>, Nathanael L. Sahli<sup>1</sup>, Jason S. Mitchell<sup>1</sup>, Christopher G. Tucker<sup>1</sup>, Kristen E. Pauken<sup>1</sup>, Klearchos Papas<sup>2</sup>, Balamurugan Appakalia<sup>3</sup>, Justin A. Spanier<sup>1</sup>, and Brian T. Fife<sup>1,\*</sup>

<sup>§</sup>Authors contributed equally.
